# Supplementary material
Source: publisher figshare collection journal article supplement (https://acs.figshare.com/ndownloader/files/3838321)
Supplement: Supplementary file 1 [file 3838321]

# Supporting Information for Manuscript “Plasmon-enhanced Terahertz Photodetection in Graphene”

*Xinghan Cai<sup>1</sup>, Andrei B. Sushkov<sup>1</sup>, Mohammad M. Jadidi<sup>2</sup>, Luke O. Nyakiti<sup>4</sup>, Rachael L.*

*Myers-Ward<sup>5</sup>, D. Kurt Gaskill<sup>5</sup>, Thomas E. Murphy<sup>2</sup>, Michael S. Fuhrer<sup>1,3</sup>, H. Dennis Drew<sup>1</sup>*

<sup>1</sup>Center for Nanophysics and Advanced Materials, University of Maryland, College Park, MD

20742-4111 USA; <sup>2</sup>Institute for Research in Electronics and Applied Physics, University of

Maryland, College Park, MD 20742 USA; <sup>3</sup>School of Physics, Monash University, 3800 Victoria,

Australia; <sup>4</sup>Texas A&M University, Galveston, TX 77553; <sup>5</sup>U.S. Naval Research Laboratory,

Washington, DC 20375, USA

## **Supplementary Movies**

(See attached file “supplementary movie.avi”)

**Supplementary Movie:** The charge density oscillation in graphene ribbons at the plasmon resonance frequency of the device as shown in Fig. 2. The polarization of the incident plane-wave (7.4 THz) is perpendicular to the ribbon in the left and parallel in the right.
